# Supplementary material
Source: PubMed Central journal article supplement (PMC6016083)
Supplement: NIHMS967603-supplement-Supporting.pdf [file NIHMS967603-supplement-Supporting.pdf]

## Supporting Information for:

# Structural Characterization of *Porphyromonas gingivalis* Enoyl-ACP Reductase

## II (FabK)

Kirk E. Hevener<sup>\*†§</sup>, Bernard D. Santarsiero<sup>†</sup>, Jesse A. Jones<sup>§</sup>, Hyun Lee<sup>†</sup>, Teuta Boci<sup>†</sup>, Michael E. Johnson<sup>†</sup>, and Shahila Mehboob<sup>\*\*</sup>

<sup>§</sup>Department of Pharmaceutical Sciences, University of Tennessee Health Science Center, 881 Madison Ave., Ste 571, Memphis, TN 38163-2198 (USA)

<sup>†</sup>Center for Pharmaceutical Biotechnology, University of Illinois at Chicago, 900 S Ashland Ave., Suite 3100, Chicago, IL 60607-7173 (USA)

\*To whom correspondence should be addressed.

KEH: Phone: 901-448-1474. Fax: 901-448-6828. E-mail: [khevener@uthsc.edu](mailto:khevener@uthsc.edu)

SM: Phone: 312-413-9304. Fax: 312-413-9303. E-mail: [shahila@uic.edu](mailto:shahila@uic.edu)

### Figure Notes.

- Figures S1, S2, and S3 were generated using the PrimeX software included in the Schrodinger molecular modeling package; Schrödinger Release 2017-3: PrimeX, Schrödinger, LLC, New York, NY, 2017.
  - Bell JA, Cao Y, Gunn JR, Day T, Gallicchio E, Zhou Z, Levy R and Farid R, "PrimeX and the Schrödinger Computational Chemistry Suite of Programs," *International Tables for Crystallography*, **2012**, 534-538.
- Figure S4 was generated using the UCSF Chimera package. *Chimera is developed by the Resource for Biocomputing, Visualization, and Informatics at the University of California, San Francisco (supported by NIGMS P41-GM103311).*
  - Pettersen EF, Goddard TD, Huang CC, Couch GS, Greenblatt DM, Meng EC, Ferrin TE, "UCSF Chimera--a visualization system for exploratory research and analysis," *J Comput Chem*. **2004**, 25(13):1605-12.

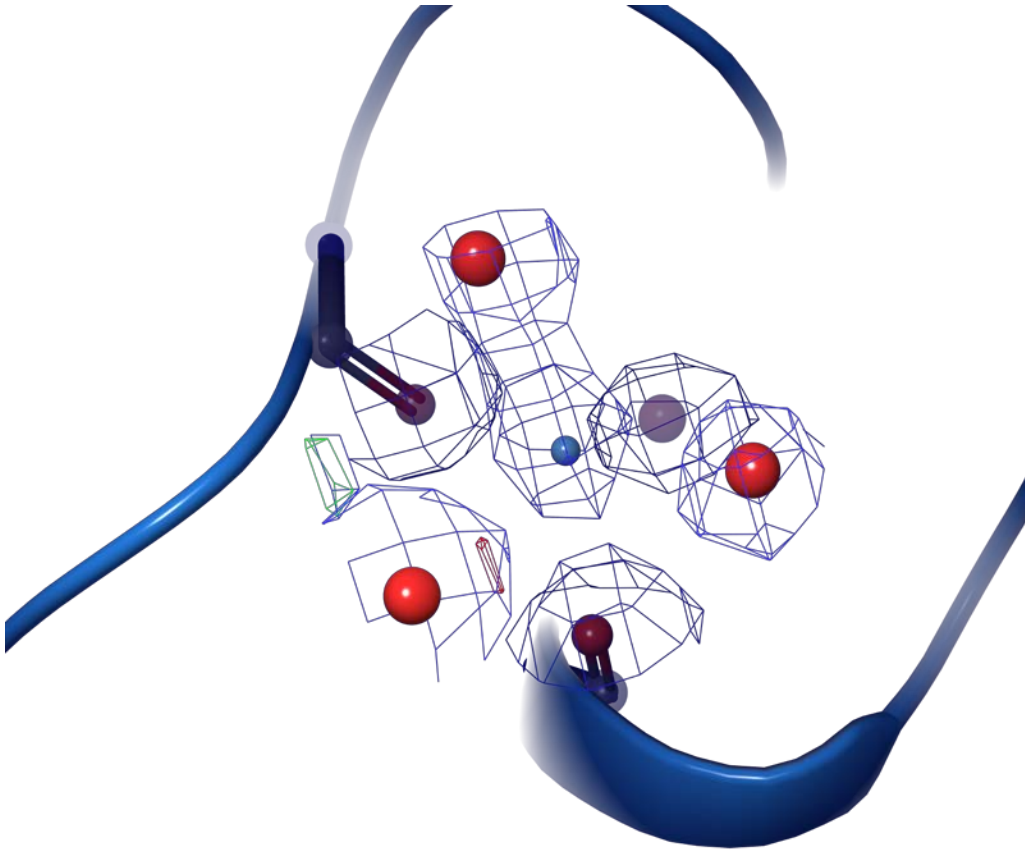

**Figure S1. Sodium ion (B-405) contour map and difference map overlay.** A sodium ion and its associated water molecules and coordinating residues are shown with both 2Fo-Fc (at 1 r.m.s.d.) and Fo-Fc (at 3 r.m.s.d.) maps. The maps have been truncated at a 2 Å distance from the displayed sodium atom (blue). Octahedral coordination geometry is discernable from the electron density which is consistent with a metal ion at this position rather than water.

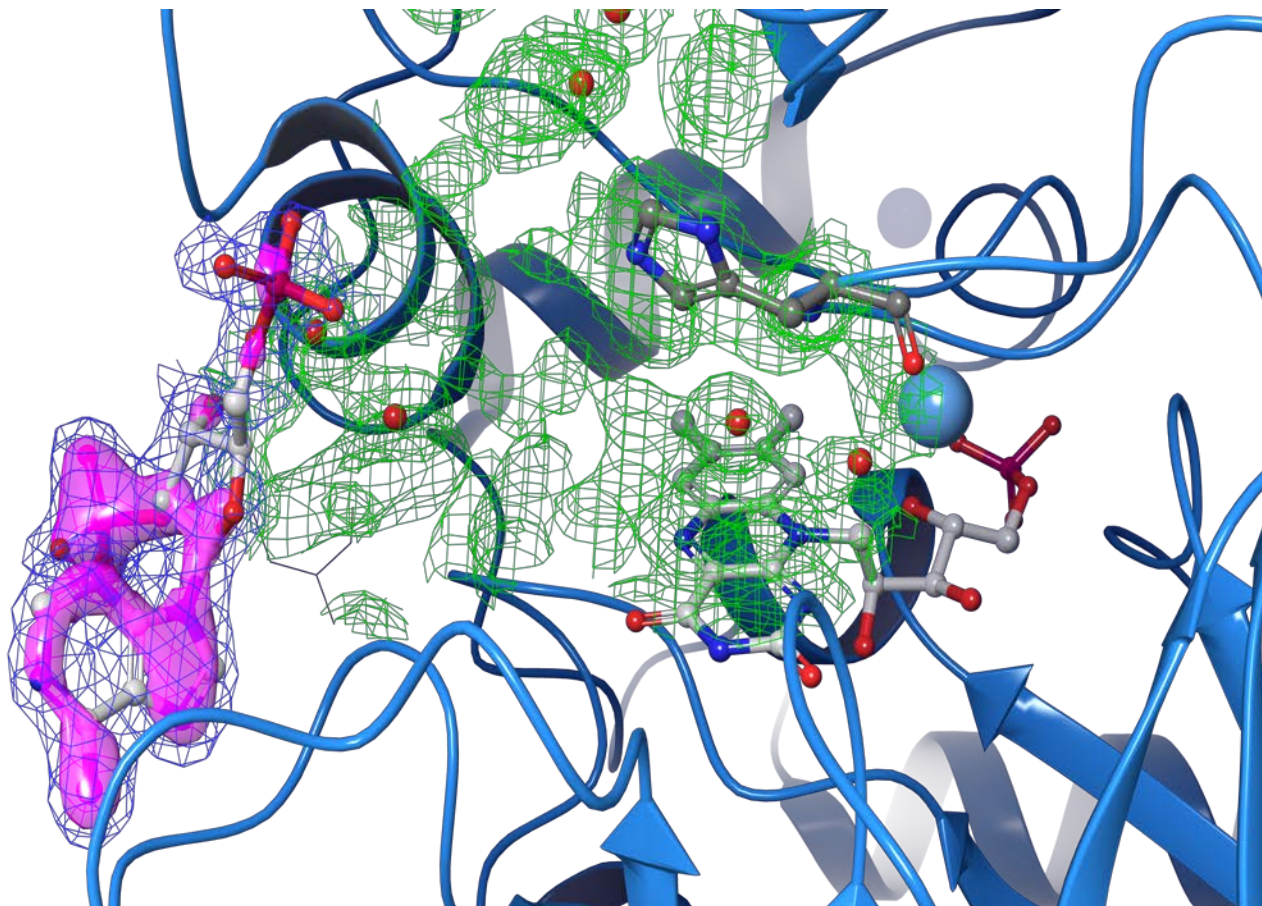

**Figure S2. NADP and *PgFabK* Active Site Electron Density.** Shown is the *PgFabK* active site with NADP (left), FMN (right), and modeled active site waters and sodium ion. 2Fo-Fc contour maps are shown at r.m.s.d. of 1 (blue mesh) and 2 (purple solid) for NADP with truncation at 1 Å from the NADP atoms. A 2Fo-Fc contour map at r.m.s.d. of 0.5 (green mesh) is shown for the active site region spanning NADPH and the FMN prosthetic group, selected by centering between the two ligands.

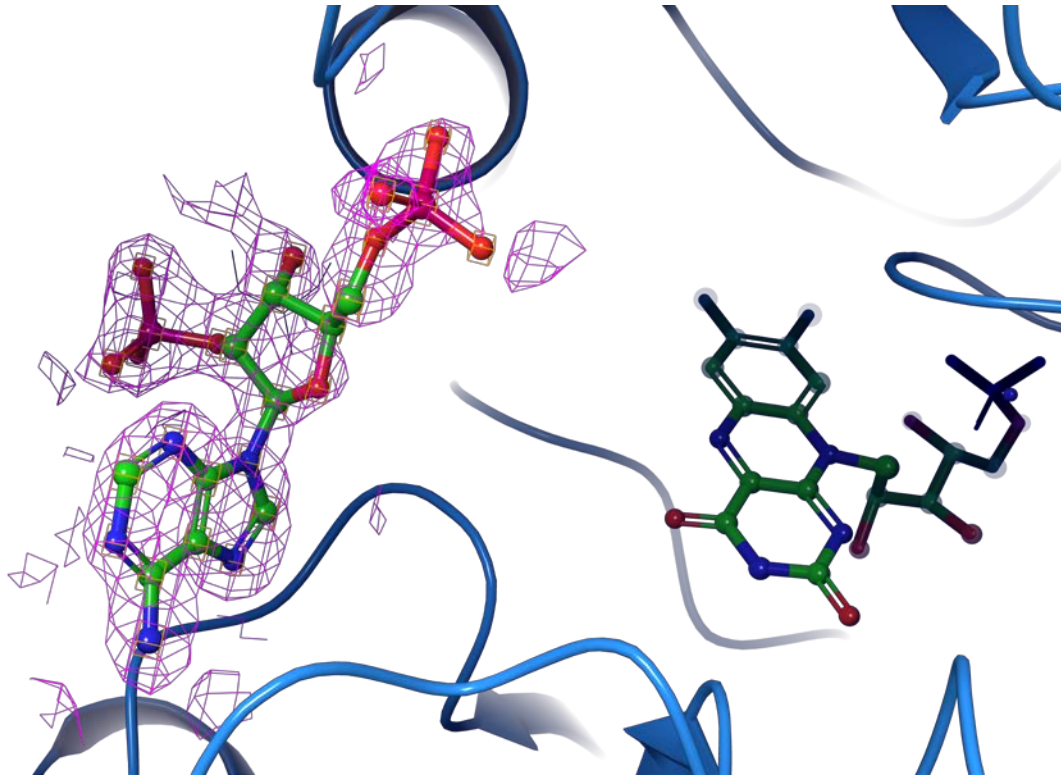

**Figure S3. 2Fo-Fc Omit Map.** Shown is a 2Fo-Fc omit map calculated by omitting the active site NADP molecule. The r.m.s.d. is 1 with truncation of the map at 2 Å from the NADPH atoms.

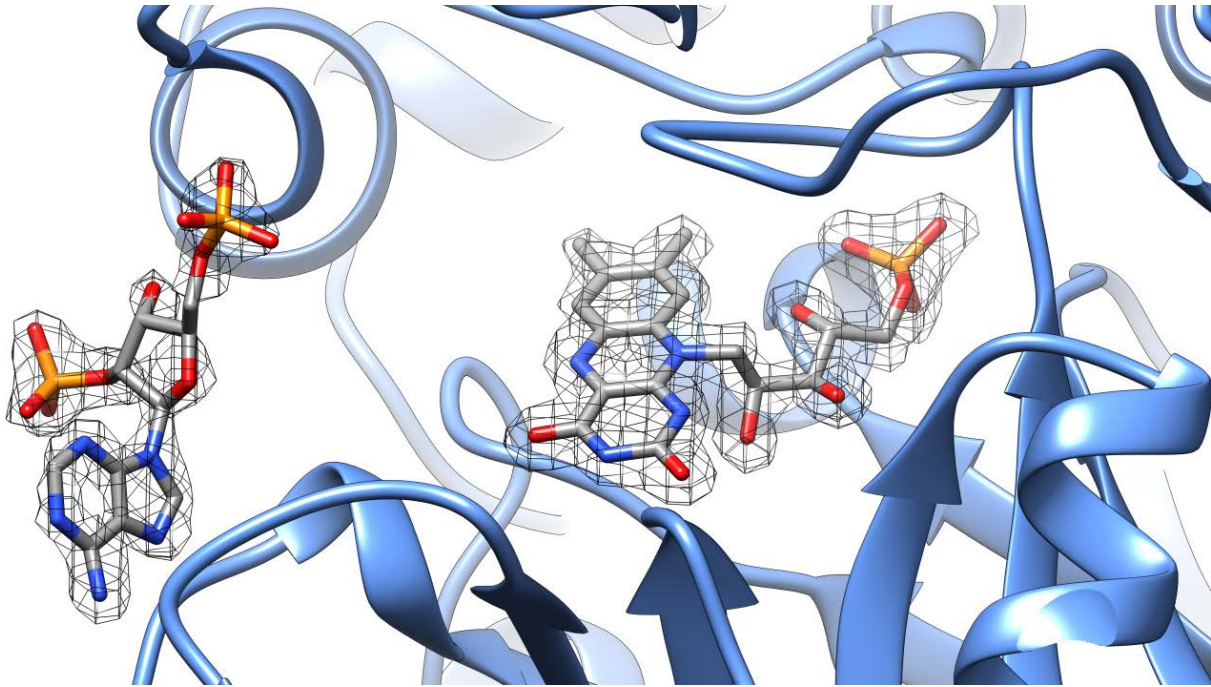

**Figure S4. FabK Cofactor FMN and NADPH Electron Density.** 2Fo-Fc contour map showing electron density of FMN prosthetic group and NADPH fragment spanning the *PgFabK* active site (shown at 1.25 r.m.s.d. with a zone radius cutoff of 1.5 Å from the FMN and NADPH ligands).

```

PgFabK      1  ---MNRICELLGIEHPIISGGMVWCSGWKLASAVSNCGGLGIGAGSMHPDNLEHHIRSC
SpFabK      1  --MKTRITELLKIDYPIFQGGMAWVADGDLGAVSKAGGLGIIIGGNAPKEVVKANIDKI
TmFabK      1  MTVTRTRVTDLLEIEHPIIMGGMAWAGTPTLAAAVSEAGGLGIIIGSGAMKPDRLRKAISEL
consensus  1  ...*...** *...**  ***.*  **.***  *****.** *  ....  *  .

PgFabK      58  KAAFDKPFQVNVPLLYPEMDKIMEIIMREHVPVVVTSAGSPKVWTAKLKAAGSKVIHVVS
SpFabK      59  KSLTDKPFQVNIIMLLSPFVEDIVDLVIEEGVKVVTTGAGNPSKYMERFHEAGIIVIPVVP
TmFabK      61  RQKTDKPFQVNIIMLVSPWADDLVKVCIEEKVPVVTFGAGNPTKYIRELKENGTKVIPVVA
consensus  61  .  *****.*...*.....*.***.....**.*.....*.....**.*

PgFabK      118  SATFARKSEAGVDAlVAEGFEAGGHNGREETTTLCLIPEVVDVAVNIPVVAAGGIASGRA
SpFabK      119  SVALAKRMEKIGADAVIAEGMEAGGHIGKLL--TTMTLVRQVATAISIPVIAAGGIADGEG
TmFabK      121  SDSLARMVERAGADAVIAEGMESGGHIGEV--TTFVLVNKVSRSVNIPVIAAGGIADGRG
consensus  121  *  ..*...*...*...*...*...*...*...*...*...*...*...*...*...*...*...

PgFabK      178  VAAALALGADAVQVGRFALSEESSAHEDFKAHCRRSVEGDTMLSL-KAVSPTRLKKNKF
SpFabK      177  AAAGFMLGAEAVQVGRFVAKESNAHPNYKEKILKARDIDTTISAQHFQHAVRAIKNQLE
TmFabK      179  NAAAFALGAEAVQVGRFVASVESDVHPVYKEKIVKASIRDVTVVTGAKLGHPARVLRTPF
consensus  181  .**...**.*...*...*...*...*...*...*...*...*...*...*...*...*...

PgFabK      237  YQDVFAAEQRCA----SVEELRELI GRGRAKQGI FEGDLHEGELEIGQAVSQISHAETVA
SpFabK      237  TRDFELAEKDAFKQEDPDLEIFEQMGAGALAKAVVHGDVDGGSVMAGQIAGLVSKETAE
TmFabK      239  ARKIQEMEFEN-----PMQAEEMLVGSLRRRAVVEGDLERGSFMVQGSAGLIDEIKPVK
consensus  241  ...  *  ..  ..  *  ..  *  .....**..*.....**  .....

PgFabK      293  EIMVDLV DGYKRS LAGMPTEI-----
SpFabK      297  EILKDLYYGAAKIKIQEEASRWTGVVRND
TmFabK      292  QIILEDILKEEKE----TVEKLRGYIEE-
consensus  301  .*  *  ..  ....  .  ....  .

```

**Figure S5. FabK Multiple Sequence Alignment.** Multiple sequence alignment of *P. gingivalis*, *S. pneumoniae*, and *T. maritima* FabK enzymes. Produced using Clustal Omega at EMBL-EBI (Sievers, F., et al. (2011). *Mol. Syst. Biol.* **7**, 539.) and rendered using the BoxShade program at the ExPASy Bioinformatics Resource Portal. Conserved active site structural motif of the NMO family of flavoproteins is shown in red box.
